# Supplementary material for: Label-free detection of polystyrene nanoparticles in Daphnia magna using Raman confocal mapping
Source: Royal Society of Chemistry journal article supplement (doi:10.1039/d3na00323j), 2023-01-01
Supplement: d3na00323j1.pdf [file d3na00323j1.pdf]

Supplementary information

**Label-free detection of polystyrene nanoparticles  
in *Daphnia magna* using Raman confocal mapping**

J. Kaur<sup>1</sup>, E. Kelpsiene<sup>2</sup>, G. Gupta<sup>1</sup>, I. Dobryden<sup>3</sup>, T. Cedervall<sup>2</sup>, and B. Fadeel<sup>1</sup>

<sup>1</sup>Division of Molecular Toxicology, Institute of Environmental Medicine, Karolinska Institutet, Stockholm, Sweden.

<sup>2</sup>NanoLund, and Department of Biochemistry and Structural Biology, Lund University, Lund, Sweden.

<sup>3</sup>Department of Material and Surface Design, RISE Research Institutes of Sweden, Stockholm, Sweden.

Table S1. Zeta potential and hydrodynamic size in various media at 100 µg/mL.

| Samples                                    | Zeta potential (mV) | Size (nm)               |
|--------------------------------------------|---------------------|-------------------------|
| COOH PS in Milli-Q®                        | -37,4 ± 0,72        | 211 ± 1                 |
| COOH PS in tap H <sub>2</sub> O            | -35,7 ± 2,55        | 187 ± 2                 |
| COOH PS in RPMI                            | -17,1 ± 0,6         | 428 ± 31                |
| COOH PS in RPMI + FBS                      | -13,0 ± 1,23        | 270 ± 3                 |
| NH <sub>2</sub> PS in Milli-Q®             | -18,5 ± 1,2         | 1164 ± 30 <sup>a</sup>  |
| NH <sub>2</sub> PS in tap H <sub>2</sub> O | -25,7 ± 0,6         | 1099 ± 265 <sup>a</sup> |
| NH <sub>2</sub> PS in RPMI                 | -11,6 ± 0,8         | 811 ± 45                |
| NH <sub>2</sub> PS in RPMI + FBS           | -12,6 ± 0,7         | 213 ± 23                |

Measurements were done for triplicate samples and data are shown as mean values ± S.D.

<sup>a</sup>Two intensity peaks were identified in these samples; the average values are reported here.

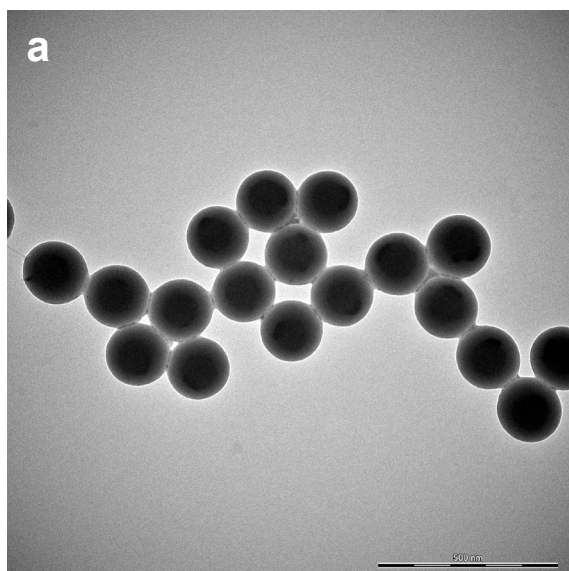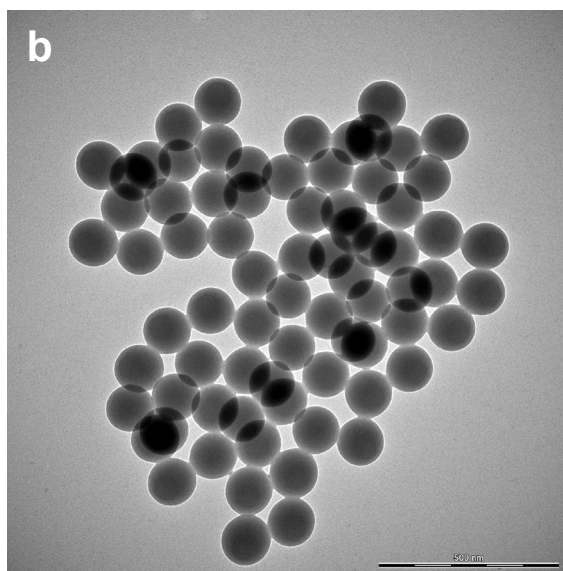

Figure S1. TEM micrographs of (a) PS-COOH NPs (diameter:  $\sim 170$  nm), and (b) PS-NH<sub>2</sub> NPs (diameter:  $\sim 130$  nm) dispersed in tap water. The particles were adhered onto grids and washed once with Milli-Q<sup>®</sup> water (no counterstaining). Some particle necking is seen. Scale bars: 500 nm.



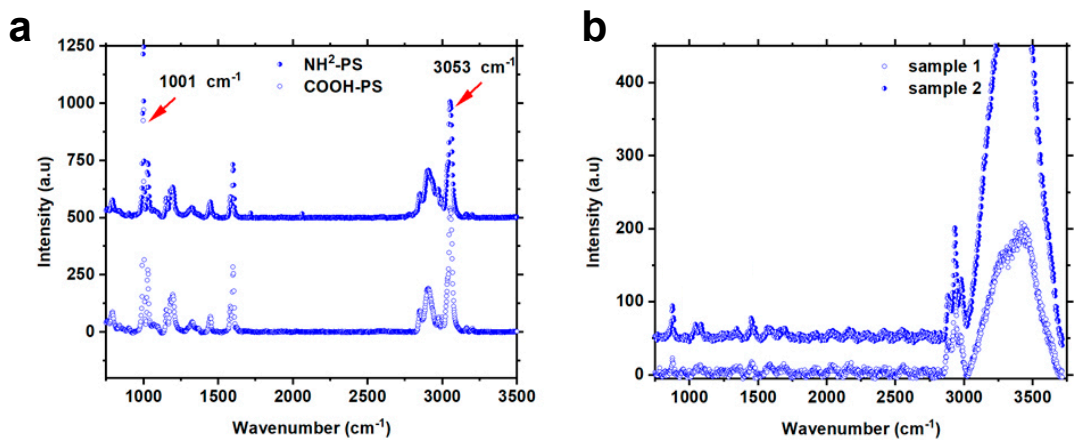

Figure S3. Raman reference spectra measured for PS NPs with COOH (empty circles) and NH<sub>2</sub> (half-filled circles) functional groups are shown in panel (a). Both specific peaks for PS at 1001 cm<sup>-1</sup> and 3053 cm<sup>-1</sup> are indicated with a red arrow. Spectra measured for control daphnia samples 1 (empty circles) and 2 (half-filled circles) are shown in panel (b). There is no PS specific peak at 1001 cm<sup>-1</sup> in these controls.

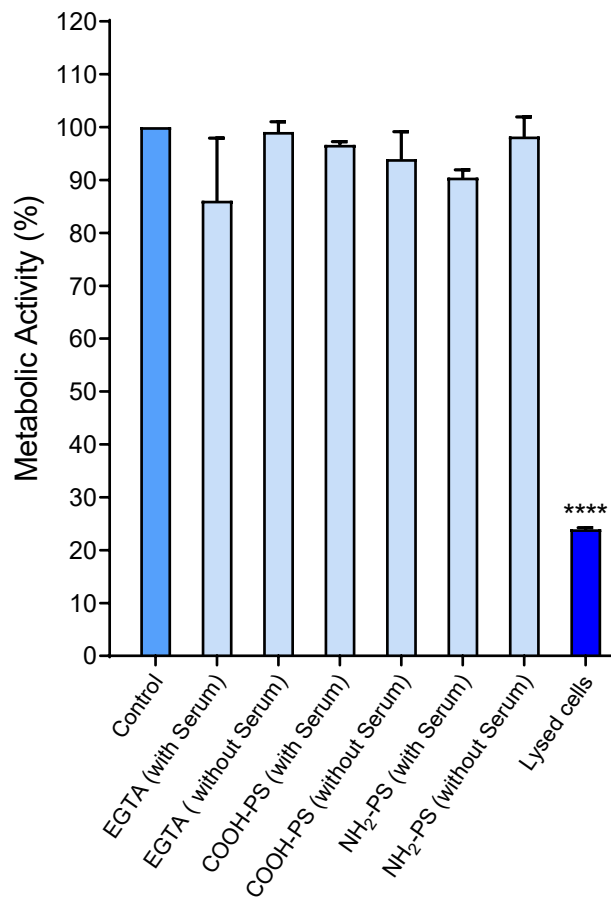

Figure S4. No PS NP-induced cytotoxicity in differentiated HT-29 cells. Human HT-29 cells differentiated for 21 days were exposed for 24 h to 100 mg/mL COOH-PS NPs or NH<sub>2</sub>-PS NPs in the presence or absence of serum (10% FBS). Cell viability (metabolic activity) was determined using the Alamar blue assay. EGTA (2.5 mM) was also included (with/without serum). The results shown are mean values  $\pm$  S.D. Data were analyzed using two-way ANOVA followed by Tukey's *post hoc* analysis. \* $p < 0.05$ , \*\*\*\* $p < 0.0001$ . For TEER measurements under the same conditions, see Figure 6.
